# Supplementary material for: Mixed-ligand Pt(ii) dithione-dithiolato complexes: influence of the dicyanobenzodithiolato ligand on the second-order NLO properties
Source: Royal Society of Chemistry journal article supplement (doi:10.1039/c2dt11956k), 2012-01-01
Supplement: c2dt11956k.pdf [file c2dt11956k.pdf]

SUPPORTING INFORMATION

**Mixed-ligand Pt(II) dithione-dithiolato complexes: influence of the dicyanobenzodithiolato ligand on the second-order-NLO Properties**

**Davide Espa, Luca Pilia, M. Laura Mercuri, Flavia Artizzu, Angela Serpe, Luciano Marchiò, Dulce Simão, Manuel Almeida, Maddalena Pizzotti, Francesca Tessore, and Paola Deplano**

List of bond distances [Å] and angles [deg] for [Pt(Bz<sub>2</sub>pipdt)(dcbdt)] (Table S1) and DFT optimized geometries for [Pt(Bz<sub>2</sub>pipdt)(dcbdt)] and [Pt(Bz<sub>2</sub>pipdt)(dmit)] (Tables S2 and S3); drawing, relative energy and percent compositions of the most significant orbitals obtained by DFT calculations in vacuum and in DMF for [Pt(Bz<sub>2</sub>pipdt)(dcbdt)] and [Pt(Bz<sub>2</sub>pipdt)(dmit)] (Tables S4 and S5); Simulated visible spectra for [Pt(Bz<sub>2</sub>pipdt)(dcbdt)] and [Pt(Bz<sub>2</sub>pipdt)(dmit)] (Figures S1 and S2).

Table S1. Bond lengths [Å] and angles [deg] for [Pt(Bz<sub>2</sub>pipdt)(dcbdt)].

---

|                     |            |
|---------------------|------------|
| Pt-S(2)             | 2.2734(10) |
| Pt-S(2)#1           | 2.2734(10) |
| Pt-S(1)#1           | 2.2784(10) |
| Pt-S(1)             | 2.2784(10) |
| S(2)-C(10)          | 1.751(4)   |
| S(1)-C(1)           | 1.688(4)   |
| C(10)-C(10)#1       | 1.390(7)   |
| C(10)-C(11)         | 1.392(5)   |
| C(4)-C(9)           | 1.371(6)   |
| C(4)-C(5)           | 1.386(7)   |
| C(4)-C(3)           | 1.515(6)   |
| C(1)-N(1)           | 1.323(4)   |
| C(1)-C(1)#1         | 1.484(8)   |
| C(12)-C(11)         | 1.380(6)   |
| C(12)-C(12)#1       | 1.411(9)   |
| C(12)-C(13)         | 1.443(6)   |
| N(1)-C(2)           | 1.467(5)   |
| N(1)-C(3)           | 1.470(5)   |
| C(2)-C(2)#1         | 1.424(9)   |
| C(2)-H(2A)          | 0.9700     |
| C(2)-H(2B)          | 0.9700     |
| C(11)-H(11)         | 0.9300     |
| C(13)-N(2)          | 1.125(6)   |
| C(5)-C(6)           | 1.395(8)   |
| C(5)-H(5)           | 0.9300     |
| C(3)-H(3A)          | 0.9700     |
| C(3)-H(3B)          | 0.9700     |
| C(6)-C(7)           | 1.366(9)   |
| C(6)-H(6)           | 0.9300     |
| C(9)-C(8)           | 1.366(7)   |
| C(9)-H(9)           | 0.9300     |
| C(7)-C(8)           | 1.338(9)   |
| C(7)-H(7)           | 0.9300     |
| C(8)-H(8)           | 0.9300     |
| S(2)-Pt-S(2)#1      | 89.88(5)   |
| S(2)-Pt-S(1)#1      | 177.25(4)  |
| S(2)#1-Pt-S(1)#1    | 90.99(4)   |
| S(2)-Pt-S(1)        | 90.99(4)   |
| S(2)#1-Pt-S(1)      | 177.25(4)  |
| S(1)#1-Pt-S(1)      | 88.27(5)   |
| C(10)-S(2)-Pt       | 103.73(13) |
| C(1)-S(1)-Pt        | 105.76(14) |
| C(10)#1-C(10)-C(11) | 119.7(2)   |
| C(10)#1-C(10)-S(2)  | 121.33(12) |
| C(11)-C(10)-S(2)    | 118.9(3)   |
| C(9)-C(4)-C(5)      | 119.1(5)   |
| C(9)-C(4)-C(3)      | 120.8(4)   |
| C(5)-C(4)-C(3)      | 120.0(4)   |
| N(1)-C(1)-C(1)#1    | 119.6(2)   |
| N(1)-C(1)-S(1)      | 120.6(3)   |
| C(1)#1-C(1)-S(1)    | 119.87(14) |
| C(11)-C(12)-C(12)#1 | 119.5(3)   |
| C(11)-C(12)-C(13)   | 120.4(4)   |
| C(12)#1-C(12)-C(13) | 120.1(2)   |
| C(1)-N(1)-C(2)      | 120.5(3)   |

|                        |          |
|------------------------|----------|
| C(1) - N(1) - C(3)     | 121.9(3) |
| C(2) - N(1) - C(3)     | 117.2(3) |
| C(2) #1 - C(2) - N(1)  | 115.1(3) |
| C(2) #1 - C(2) - H(2A) | 108.5    |
| N(1) - C(2) - H(2A)    | 108.5    |
| C(2) #1 - C(2) - H(2B) | 108.5    |
| N(1) - C(2) - H(2B)    | 108.5    |
| H(2A) - C(2) - H(2B)   | 107.5    |
| C(12) - C(11) - C(10)  | 120.7(4) |
| C(12) - C(11) - H(11)  | 119.7    |
| C(10) - C(11) - H(11)  | 119.7    |
| N(2) - C(13) - C(12)   | 178.9(6) |
| C(4) - C(5) - C(6)     | 119.9(6) |
| C(4) - C(5) - H(5)     | 120.1    |
| C(6) - C(5) - H(5)     | 120.1    |
| N(1) - C(3) - C(4)     | 113.8(3) |
| N(1) - C(3) - H(3A)    | 108.8    |
| C(4) - C(3) - H(3A)    | 108.8    |
| N(1) - C(3) - H(3B)    | 108.8    |
| C(4) - C(3) - H(3B)    | 108.8    |
| H(3A) - C(3) - H(3B)   | 107.7    |
| C(7) - C(6) - C(5)     | 118.9(7) |
| C(7) - C(6) - H(6)     | 120.6    |
| C(5) - C(6) - H(6)     | 120.6    |
| C(8) - C(9) - C(4)     | 120.0(6) |
| C(8) - C(9) - H(9)     | 120.0    |
| C(4) - C(9) - H(9)     | 120.0    |
| C(8) - C(7) - C(6)     | 120.9(7) |
| C(8) - C(7) - H(7)     | 119.5    |
| C(6) - C(7) - H(7)     | 119.5    |
| C(7) - C(8) - C(9)     | 121.2(7) |
| C(7) - C(8) - H(8)     | 119.4    |
| C(9) - C(8) - H(8)     | 119.4    |

---

atoms: Symmetry transformations used to generate equivalent  
#1 -x+1,y,-z+1/2

**Table S2.** Cartesian coordinates of the optimized complex [Pt(Bz2pipdt)(dcbdt)] (B3LYP/6-311G(d,p)-SDD).

|    |          |          |          |
|----|----------|----------|----------|
| C  | 3.34176  | 6.07453  | 1.16719  |
| C  | 3.90209  | 4.91259  | 1.69180  |
| C  | 2.87109  | 6.08104  | -0.14407 |
| C  | 3.99769  | 3.76562  | 0.90721  |
| C  | 2.96139  | 4.93185  | -0.92439 |
| C  | -7.50807 | 1.36655  | -0.49032 |
| C  | 3.52927  | 3.76534  | -0.40740 |
| C  | -6.28788 | 0.66917  | -0.24011 |
| C  | -5.07616 | 1.31168  | -0.47031 |
| C  | -7.50805 | -1.36664 | 0.49035  |
| C  | -6.28788 | -0.66925 | 0.24013  |
| C  | -3.85448 | 0.66407  | -0.23828 |
| C  | -5.07614 | -1.31175 | 0.47031  |
| C  | -3.85447 | -0.66413 | 0.23827  |
| C  | 4.86461  | -0.46050 | 0.60104  |
| C  | 3.67751  | -2.55108 | 1.31234  |
| C  | 2.45559  | 0.66859  | -0.29270 |
| C  | 3.67747  | 2.55116  | -1.31232 |
| C  | 2.45560  | -0.66854 | 0.29270  |
| C  | 4.86460  | 0.46057  | -0.60105 |
| C  | 3.52937  | -3.76528 | 0.40742  |
| C  | 2.96154  | -4.93181 | 0.92442  |
| C  | 3.99778  | -3.76554 | -0.90719 |
| C  | 2.87129  | -6.08101 | 0.14410  |
| C  | 3.90223  | -4.91253 | -1.69177 |
| C  | 3.34196  | -6.07448 | -1.16715 |
| H  | 3.26323  | 6.96580  | 1.77869  |
| H  | 4.26156  | 4.89653  | 2.71440  |
| H  | 2.42104  | 6.97683  | -0.55615 |
| H  | 4.42428  | 2.86315  | 1.33073  |
| H  | 2.57586  | 4.93910  | -1.93884 |
| H  | -5.07946 | 2.33139  | -0.83517 |
| H  | 4.95825  | 0.12080  | 1.52818  |
| H  | 2.89564  | -2.56757 | 2.07758  |
| H  | 4.63738  | -2.59693 | 1.83426  |
| H  | -5.07943 | -2.33146 | 0.83518  |
| H  | 5.71671  | 1.13858  | -0.53914 |
| H  | 5.71673  | -1.13849 | 0.53912  |
| H  | 4.63735  | 2.59703  | -1.83422 |
| H  | 2.89561  | 2.56763  | -2.07758 |
| H  | 2.57602  | -4.93907 | 1.93887  |
| H  | 4.95824  | -0.12072 | -1.52819 |
| H  | 4.42432  | -2.86306 | -1.33071 |
| H  | 2.42128  | -6.97682 | 0.55619  |
| H  | 4.26170  | -4.89646 | -2.71437 |
| H  | 3.26346  | -6.96577 | -1.77864 |
| N  | -8.48118 | 1.95285  | -0.70131 |
| N  | -8.48115 | -1.95296 | 0.70135  |
| N  | 3.63977  | -1.25764 | 0.62217  |
| N  | 3.63975  | 1.25770  | -0.62217 |
| S  | -2.35902 | 1.52678  | -0.54495 |
| S  | 0.99511  | 1.49705  | -0.57250 |
| S  | -2.35900 | -1.52682 | 0.54492  |
| S  | 0.99514  | -1.49704 | 0.57247  |
| Pt | -0.70800 | -0.00001 | -0.00001 |

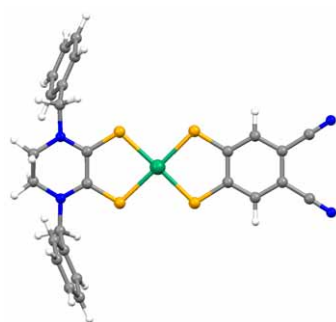

B3LYP/6-311G(d,p)-SDD

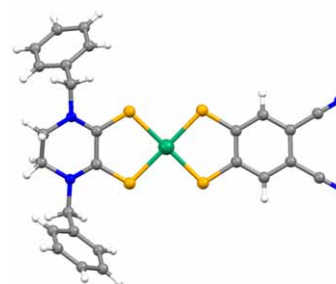

X-Ray

**Table S3.** Cartesian coordinates of the optimized complex [Pt(Bz2pipdt)(dmit)] (B3LYP/6-311G(d,p)-SDD).

|    |          |          |          |
|----|----------|----------|----------|
| Pt | 3.737352 | 3.974797 | 2.039873 |
| S  | 3.897323 | -0.69005 | 7.671681 |
| S  | 4.435691 | 6.155474 | 1.629329 |
| S  | 4.576006 | 4.031299 | 4.213163 |
| S  | 2.971132 | 1.806579 | 2.416007 |
| S  | 2.965067 | 3.951645 | -0.15434 |
| S  | 3.118522 | -0.00447 | 4.849784 |
| S  | 4.561225 | 1.974996 | 6.448397 |
| N  | 4.201067 | 7.74828  | -0.50645 |
| C  | 3.981668 | 6.504392 | 0.011454 |
| C  | 3.46912  | 1.531152 | 4.056056 |
| C  | 3.354226 | 5.488123 | -0.8125  |
| N  | 3.08275  | 5.758624 | -2.12275 |
| C  | 2.451339 | 4.79758  | -3.03791 |
| H  | 1.643637 | 5.324837 | -3.55613 |
| H  | 1.9919   | 4.012509 | -2.43888 |
| C  | 4.827512 | 8.844009 | 0.24637  |
| H  | 5.60235  | 9.277251 | -0.39461 |
| H  | 5.328469 | 8.415105 | 1.113174 |
| C  | 3.405925 | 4.207046 | -4.0609  |
| C  | 4.141405 | 2.458191 | 4.80483  |
| C  | 3.855559 | 9.931976 | 0.66839  |
| C  | 2.759183 | 9.64115  | 1.489597 |
| H  | 2.594209 | 8.626068 | 1.832767 |
| C  | 4.536822 | 3.484996 | -3.65998 |
| H  | 4.741582 | 3.341786 | -2.60503 |
| C  | 3.861317 | 0.35955  | 6.40452  |
| C  | 5.395486 | 2.9389   | -4.60878 |
| H  | 6.264875 | 2.37791  | -4.28542 |
| C  | 2.093795 | 11.96398 | 1.457683 |
| H  | 1.412616 | 12.74884 | 1.765763 |
| C  | 4.055285 | 11.2491  | 0.24958  |
| H  | 4.90351  | 11.48807 | -0.38451 |
| C  | 3.15547  | 4.367251 | -5.42535 |
| H  | 2.280176 | 4.922013 | -5.749   |
| C  | 1.884345 | 10.65066 | 1.878553 |
| H  | 1.042165 | 10.41332 | 2.51848  |
| C  | 5.135355 | 3.101579 | -5.96953 |
| H  | 5.804143 | 2.671453 | -6.70618 |
| C  | 4.012303 | 3.815237 | -6.3767  |
| H  | 3.801868 | 3.945076 | -7.4322  |
| C  | 3.182352 | 12.26228 | 0.643813 |
| H  | 3.353366 | 13.28054 | 0.313471 |
| C  | 3.65756  | 6.951444 | -2.73853 |
| H  | 3.0892   | 7.175931 | -3.64289 |
| H  | 4.69737  | 6.768077 | -3.03422 |
| C  | 3.573069 | 8.114411 | -1.77293 |
| H  | 4.104393 | 8.976384 | -2.18037 |
| H  | 2.529436 | 8.410194 | -1.61292 |

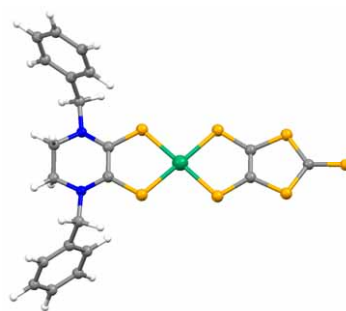

B3LYP/6-311G(d,p)-SDD

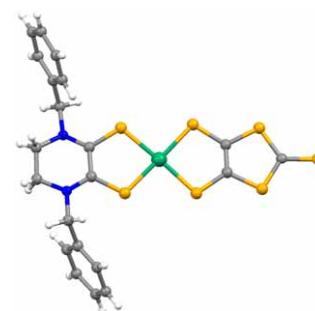

X-Ray

**Table S4.** MOs diagrams of [Pt(Bz<sub>2</sub>pipdt)(dcbdt)] in the gas-phase (B3LYP/6-311G(d,p)-SDD), together with the contribution of different fragments to complexes valence orbitals

|             | 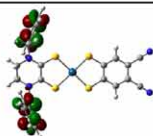   | E (eV)       | Fragment composition (%) |                       |             |
|-------------|-------------------------------------------------------------------------------------|--------------|--------------------------|-----------------------|-------------|
|             |                                                                                     |              | Pt                       | Bz <sub>2</sub> pipdt | dcbdt       |
| LUMO+3      |    | -1.12        | 1.4                      | 98.4                  | 0.1         |
| LUMO+2      |    | -1.47        | 1.1                      | 0.0                   | 98.9        |
| LUMO+1      |    | -1.88        | 33.7                     | 30.0                  | 36.3        |
| <b>LUMO</b> |    | <b>-3.85</b> | <b>6.3</b>               | <b>78.4</b>           | <b>15.3</b> |
| <b>HOMO</b> |  | <b>-5.47</b> | <b>8.4</b>               | <b>23.3</b>           | <b>68.3</b> |
| HOMO-1      |  | -5.91        | 18.8                     | 4.5                   | 76.7        |
| HOMO-2      |  | -7.01        | 81.3                     | 4.5                   | 14.2        |
| HOMO-3      |  | -7.10        | 20.6                     | 54.3                  | 25.2        |
| HOMO-4      |  | -7.16        | 28.5                     | 29.2                  | 42.3        |

**Table S5.** MOs diagrams of [Pt(Bz<sub>2</sub>pipdt)(dcbdt)] in the solution phase, DMF, (B3LYP/6-311G(d,p)-SDD), together with the contribution of different fragments to complexes valence orbitals.

|             | 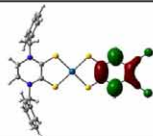   | E (eV)       | Fragment composition (%) |                       |             |
|-------------|-------------------------------------------------------------------------------------|--------------|--------------------------|-----------------------|-------------|
|             |                                                                                     |              | Pt                       | Bz <sub>2</sub> pipdt | dcbdt       |
| LUMO+3      |    | -1.35        | 0.3                      | 0.0                   | 99.7        |
| LUMO+2      |    | -1.85        | 34.5                     | 30.1                  | 35.4        |
| LUMO+1      |    | -1.99        | 1.1                      | 0.0                   | 98.9        |
| <b>LUMO</b> |    | <b>-3.72</b> | <b>4.6</b>               | <b>88.2</b>           | <b>7.2</b>  |
| <b>HOMO</b> |  | <b>-5.64</b> | <b>13.7</b>              | <b>17.6</b>           | <b>68.7</b> |
| HOMO-1      |  | -6.10        | 26.8                     | 10.7                  | 62.5        |
| HOMO-2      |  | -6.87        | 85.0                     | 6.2                   | 8.8         |
| HOMO-3      |  | -6.99        | 3.0                      | 87.2                  | 9.8         |
| HOMO-4      |  | -7.05        | 0.8                      | 96.5                  | 2.7         |

**Table S6.** MOs diagrams of [Pt(Bz<sub>2</sub>pipdt)(dmit)] in the gas-phase (B3LYP/6-311G(d,p)-SDD), together with the contribution of different fragments to complexes valence orbitals

|             | 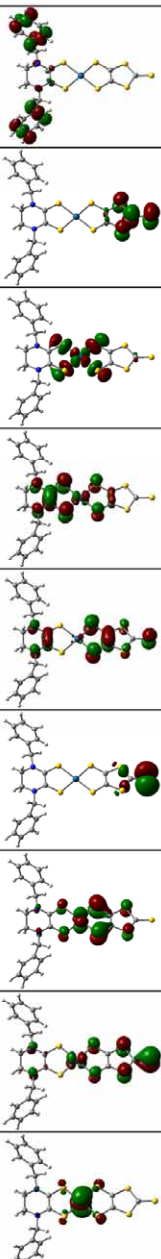  | E (eV )      | Fragment composition (%) |                       |             |
|-------------|-------------------------------------------------------------------------------------|--------------|--------------------------|-----------------------|-------------|
|             |                                                                                     |              | Pt                       | Bz <sub>2</sub> pipdt | dcbdt       |
| LUMO+3      |    | -1.16        | 0.7                      | 00.0                  | 0.3         |
| LUMO+2      |    | -1.61        | 0.0                      | 0.0                   | 100         |
| LUMO+1      |    | -1.94        | 33.3                     | 30.9                  | 35.8        |
| <b>LUMO</b> |    | <b>-3.70</b> | <b>5.5</b>               | <b>70.6</b>           | <b>23.9</b> |
| <b>HOMO</b> |   | <b>-4.96</b> | <b>3.1</b>               | <b>27.2</b>           | <b>69.7</b> |
| HOMO-1      |  | -6.00        | 0.6                      | 0.9                   | 98.6        |
| HOMO-2      |  | -6.12        | 28.7                     | 15.5                  | 55.8        |
| HOMO-3      |  | -6.24        | 15.1                     | 14.7                  | 70.2        |
| HOMO-4      |  | -6.93        | 74.9                     | 11.1                  | 14.0        |



**Table S7.** MOs diagrams of [Pt(Bz<sub>2</sub>pipdt)(dmit)] in the solution phase, DMF, (B3LYP/6-311G(d,p)-SDD), together with the contribution of different fragments to complexes valence orbitals.

|             | 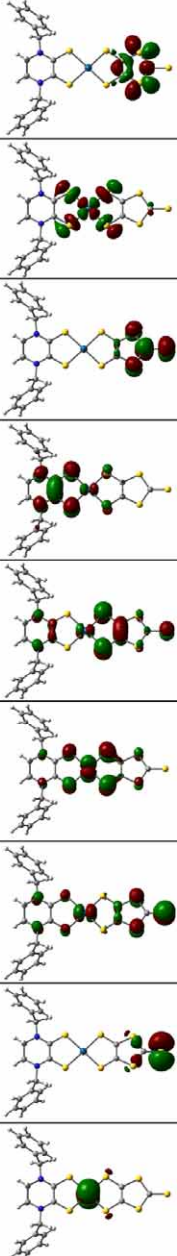 | E (eV)       | Fragment composition (%) |                       |             |
|-------------|------------------------------------------------------------------------------------|--------------|--------------------------|-----------------------|-------------|
|             |                                                                                    |              | Pt                       | Bz <sub>2</sub> pipdt | dmit        |
| LUMO+3      |                                                                                    | -0.87        | 2.8                      | 3.5                   | 93.7        |
| LUMO+2      |                                                                                    | -2.05        | 33.9                     | 30.5                  | 35.6        |
| LUMO+1      |                                                                                    | -2.15        | 0.0                      | 0.0                   | 100         |
| <b>LUMO</b> |                                                                                    | <b>-3.74</b> | <b>4.4</b>               | <b>84.6</b>           | <b>11.0</b> |
| <b>HOMO</b> |                                                                                    | <b>-5.26</b> | <b>6.0</b>               | <b>17.0</b>           | <b>77.0</b> |
| HOMO-1      |                                                                                    | -6.29        | 33.8                     | 25.8                  | 40.4        |
| HOMO-2      |                                                                                    | -6.57        | 20.7                     | 23.6                  | 55.7        |
| HOMO-3      |                                                                                    | -6.64        | 0.6                      | 1.6                   | 97.8        |
| HOMO-4      |                                                                                    | -6.92        | 85.8                     | 6.1                   | 8.1         |

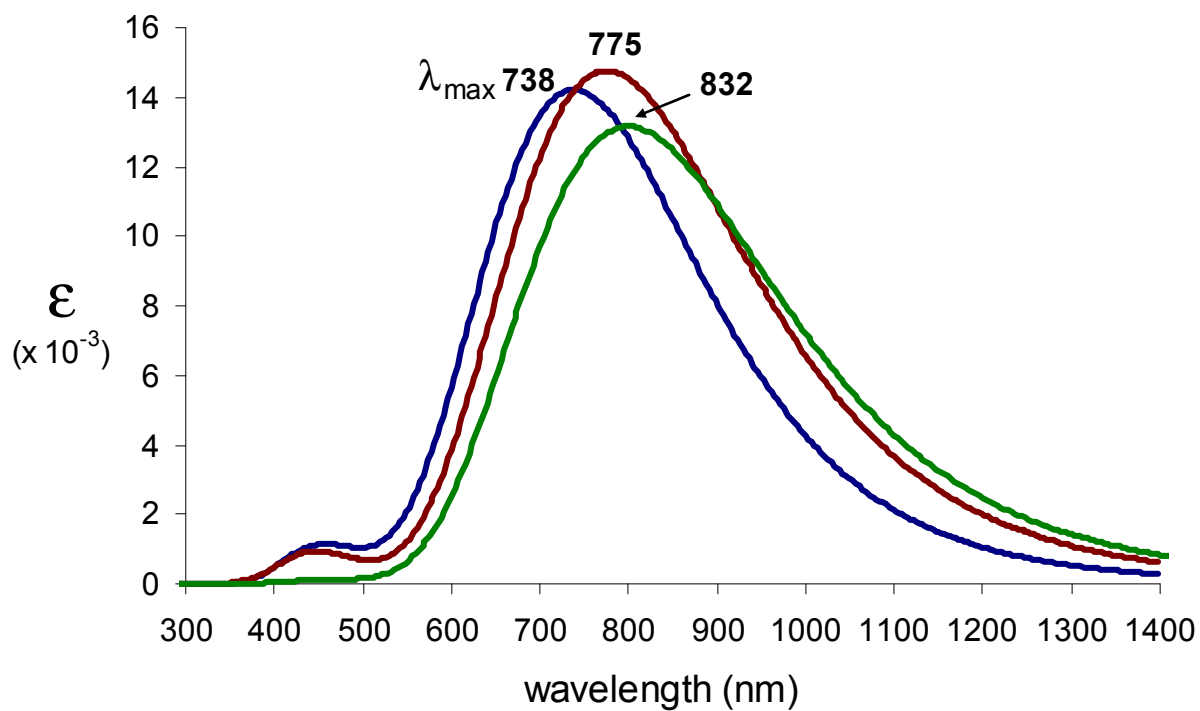

**Figure S1.** Simulated UV-vis spectrum of [Pt(Bz<sub>2</sub>pipdt)(dcbdt)]. Calculation were performed with the CPCM method (DMF, blue; CHCl<sub>3</sub>, red) and in Void (green), B3LYP/6-311G(d,p)-SDD.

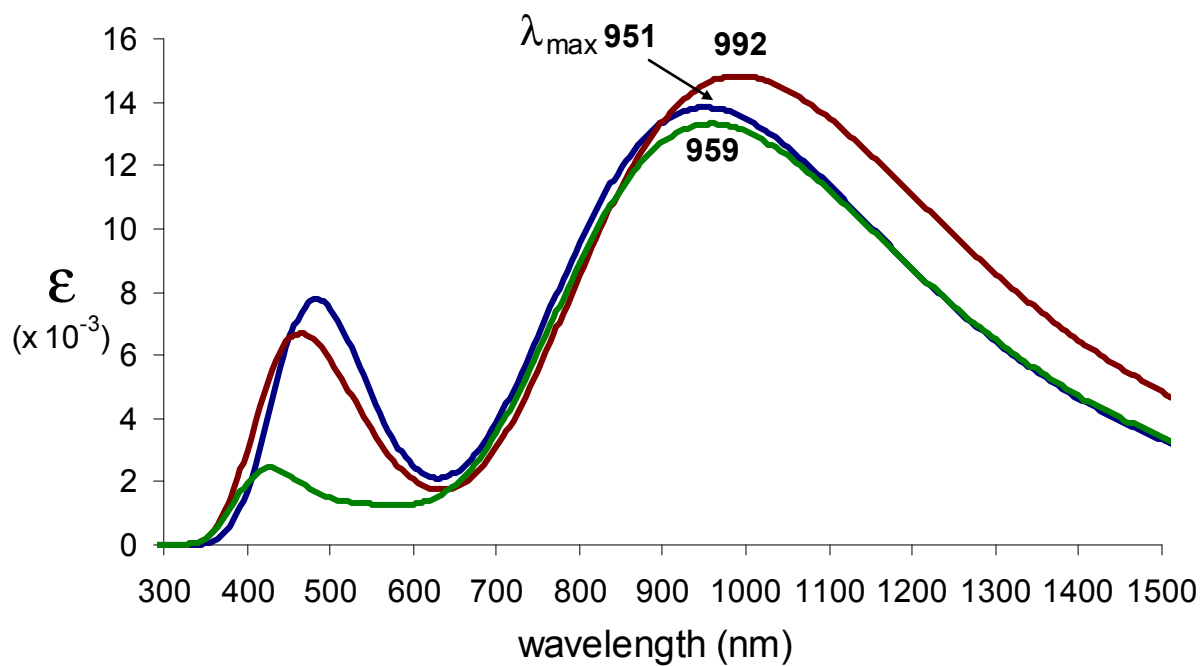

**Figure S2.** Simulated UV-vis spectrum of [Pt(Bz<sub>2</sub>pipdt)(dmit)]. Calculation were performed with the CPCM method (DMF, blue; CHCl<sub>3</sub>, red) and in Void (green), B3LYP/6-311G(d,p)-SDD.
